# Supplementary material
Source: Springer Nature journal article supplement (https://www.springermedizin.de/resource/supplementary/13053_2008_130_MOESM1_ESM.pdf/9674296)

**I**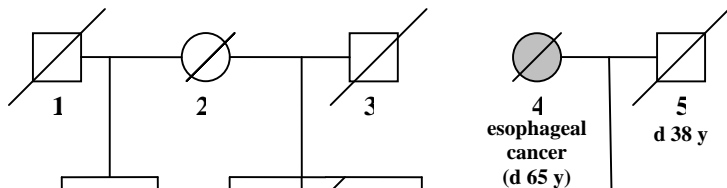**II**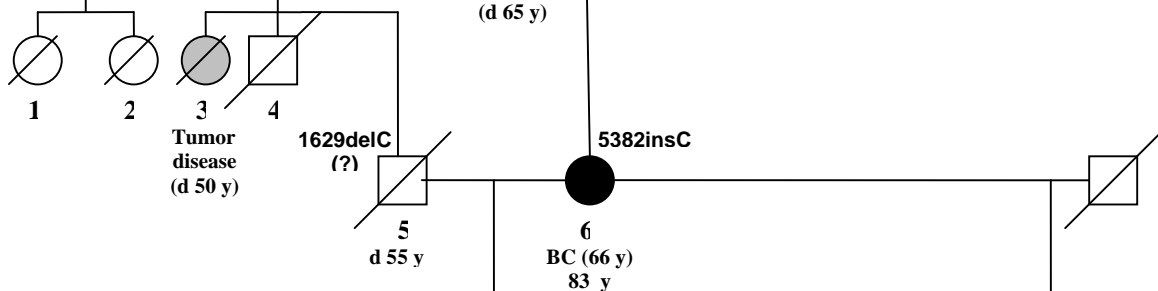**III**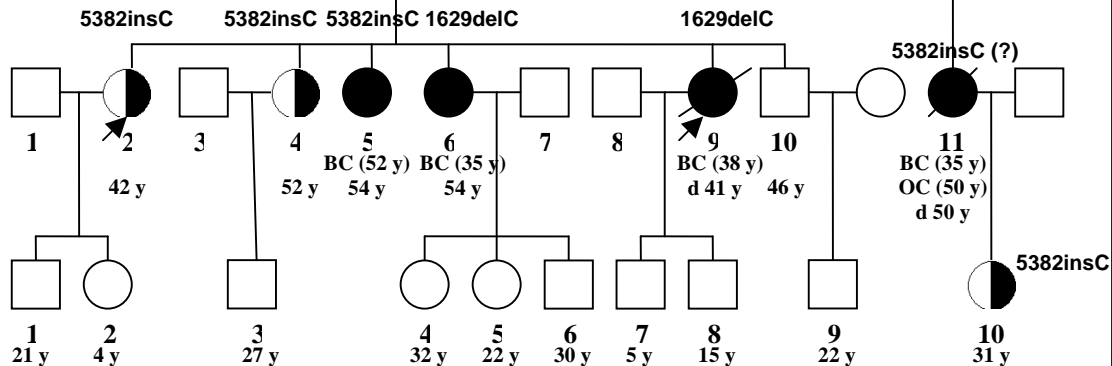**IV**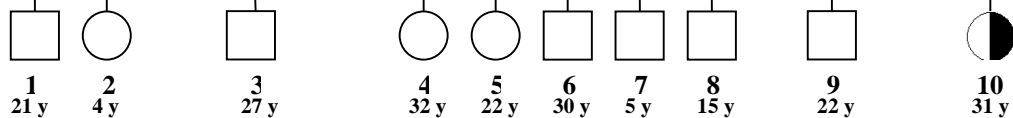

Supplement: MOESM1 [file 9674296]
